# Supplementary material for: LncRNA ANRIL affects the sensitivity of ovarian cancer to cisplatin via regulation of let-7a/HMGA2 axis
Source: Oxford University Press journal article supplement (doi:10.1042/bsr20182101), 2019-06-12
Supplement: bsr-2018-2101_supp.pdf [file bsr-2018-2101_supp.pdf]

**Supplementary Table 1:** Sequences used in the present study

| Name             | Sequences                                                                               |
|------------------|-----------------------------------------------------------------------------------------|
| ANRIL            | F:5' - TGCTCTATCCGCCAATCAGG - 3'<br>R:5'-GGGCCTCAGTGGCACATAACC-3'                       |
| let-7a           | F:5'-TGCCTCCCCGACACCATG-3'<br>R:5'-GGATTCCCAGCCATTGTCC-3'                               |
| U6               | F:5'-CTCGCTTCGGCAGCACA-3'<br>F:5'-AACGCTTCACGAATTTGCGT-3'                               |
| GAPDH            | F:5'-GTCAACGGATTTGGTCTGTATT-3'<br>F:5'-AGTCTTCTGGGTGGCAGTGAT-3'                         |
| ANRIL siRNA      | 5'-AAAUCCAGAACCCUCUGACAUUUGC-3'                                                         |
| siRNA control    | 5'-UUCUCCGAACGUGUCACGUTT-3'                                                             |
| let-7a mimic     | 5'-UGAGGUAGUAGGUUGUAUAGUU-3'                                                            |
| let-7a inhibitor | 5'-CUAUACAACCUACUACCUCAUU-3'                                                            |
| ANRIL 3'UTR      | F:5' - CCGCTCGAGGGGAGGCGAAAGGCACTTCT-3'<br>R:5'-ATAAGAATGCGGCCGCTGGCTTCTCTCACATGGCAA-3' |
| HMGA2 3'UTR      | F:5' - GCCCTCGAGAGCCTCAGAGCATTTAAGGA-3'<br>R:5' - AATGCGGCCGCACTACACATCACACAAGATT-3'    |
